# Supplementary material for: Prophylactic Antibiotic Administration in Adults with Out-of-Hospital Cardiac Arrest: A Systematic Review and Meta-analysis
Source: Research Square preprint supplement (doi:10.21203/rs.3.rs-2027467/v1), 2022-09-12
Supplement: Supplementary file 1 [file 357132fec791dc961270ddd7.docx]

**Trials excluded due to lack of control groups compared the effect of prophylactic antibiotics administration with delayed/ clinically-driven/ even no administration of antibiotics (n= 14)**

1. Abou Dagher G, Bou Chebl R, Safa R, et al. The prevalence of bacteremia in out of hospital cardiac arrest patients presenting to the emergency department of a tertiary care hospital. Ann Med. 2021;53(1):1207-1215.
2. Kroupa J, Knot J, Ulman J, et al. Clinical and laboratory predictors of infectious complications in patients after out-of-hospital cardiac arrest. J Crit Care 2017; 42:85–91.
3. Lin CH, Chen PL, Huang YT, et al. Blood Cultures and Appropriate Antimicrobial Administration after Achieving Sustained Return of Spontaneous Circulation in Adults with Nontraumatic Out-of-Hospital Cardiac Arrest. Antibiotics (Basel). 2021;10(7):876.
4. Hasslacher J, Steinkohl F, Ulmer H, et al. Increased risk of ventilator-associated pneumonia in patients after cardiac arrest treated with mild therapeutic hypothermia. Acta Anaesthesiol Scand. 2022 ;66(6):704-712.
5. Manchal N, Siriwardena M, Hay K, et al. Assessment of the Clinical Pulmonary Infection Scores for prediction of ventilator associated pneumonia in patients with out of hospital cardiac arrest. Infect Dis Health. 2021;26(1):48-54.
6. Shiba D, Hifumi T, Watanabe Y,et al. Association between inflammation in acute phase and early onset pneumonia in patients with out-of-hospital cardiac arrest treated with extracorporeal cardiopulmonary resuscitation. Acute Med Surg. 2020; 7(1): e610.
7. Shiba D, Hifumi T, Tsuchiya M, et al. Pneumonia and Extracorporeal Cardiopulmonary Resuscitation Followed by Targeted Temperature Management in Patients With Out-of-Hospital Cardiac Arrest Retrospective Cohort Study. Circ Rep. 2019; 1(12):575-581.
8. Hellenkamp K, Onimischewski S, Kruppa J, et al. Early pneumonia and timing of antibiotic therapy in patients after nontraumatic out-of-hospital cardiac arrest. Crit Care. 2016; 20:31.
9. Gajic O, Festic E, Afessa B. Infectious complications in survivors of cardiac arrest admitted to the medical intensive care unit. Resuscitation. 2004; 60(1):65-9.
10. Rello J, Vallés J, Jubert P, et al. Lower respiratory tract infections following cardiac arrest and cardiopulmonary resuscitation. Clin Infect Dis. 1995; 21(2):310-4.
11. Dankiewicz J, Nielsen N, Linder A, et al. TTM trial investigators. Infectious complications after out-of-hospital cardiac arrest-A comparison between two target temperatures. Resuscitation. 2017; 113:70-76.
12. Perbet S, Mongardon N, Dumas F, et al. Early-onset pneumonia after cardiac arrest: characteristics, risk factors and influence on prognosis. Am J Respir Crit Care Med. 2011;184(9):1048-54.
13. Skrifvars MB, Pettilä V, Rosenberg PH, et al. A multiple logistic regression analysis of in-hospital factors related to survival at six months in patients resuscitated from out-of-hospital ventricular fibrillation. Resuscitation. 2003; 59(3):319-28.
14. Kocjancic ST, Jazbec A, Noc M. Impact of intensified postresuscitation treatment on outcome of comatose survivors of out-of-hospital cardiac arrest according to initial rhythm. Resuscitation. 2014; 85(10):1364-9.

**Trials excluded due to a form of only abstracts (n= 4)**

1. Jimison K, Chanas T. 697: EVALUATION OF CULTURES AND ANTIBIOTIC USE FOLLOWING CARDIAC ARREST[J]. Critical Care Medicine. 2022; 50(1): 342.
2. Poquiz H, Ehrenfeld H, Duong H, et al. 698: ANTIBIOTIC PROPHYLAXIS IN CARDIAC ARREST PATIENTS RECEIVING TARGETED TEMPERATURE MANAGEMENT[J]. Critical Care Medicine. 2022; 50(1): 343.
3. Herzig N R, Harpenau T L, Wohlfarth K M, et al. 1471. Evaluation of Antibiotic De-escalation in Post Cardiac Arrest Patients with Culture-Negative versus Culture-Positive Aspiration Pneumonia[C]//Open Forum Infectious Diseases. Oxford University Press. 2020; 7(Suppl 1): S737.
4. Heo E Y, Shin J H, Han S K, et al. Effect of antibiotic prophylaxis on pneumonia in cardiac arrest patients treated with therapeutic hypothermia[J]. 2012.
5. Daix T, Cariou A, Meziani F. Short term antibiotics prevent early VAP in patients treated with mild therapeutic hypothermia after cardiac arrest[C]. Critical Care Conference: 38th International Symposium on Intensive Care and Emergency Medicine. ISICEM. 2018; 22.
6. Hendriks B, Gordts B, Malbrain M, et al. Antibiotic prophylaxis is superior to selective antibiotic therapy in patients treated with therapeutic hypothermia after out-of-hospital cardiac arrest[C]. ESICM 26th Annual Congress. 2013.

**Trials excluded due to patients following in-hospital cardiac arrest (n= 1)**

1. Mortensen S J, Hurley M, Blewett L, et al. Infections in out-of-hospital and in-hospital post-cardiac arrest patients[J]. Internal and Emergency Medicine. 2020; 15(4): 701-709.

**Trials excluded due to a form of protocol (n= 1)**

1. Gagnon DJ, Ryzhov SV, May MA, et al. Ceftriaxone to PRevent pneumOnia and inflammaTion aftEr Cardiac arresT (PROTECT): study protocol for a randomized, placebo-controlled trial. Trials. 2022; 23(1):197.
