# Supplementary material for: Prophylactic Antibiotic Administration in Adults with Out-of-Hospital Cardiac Arrest: A Systematic Review and Meta-analysis
Source: Research Square preprint supplement (doi:10.21203/rs.3.rs-2027467/v1), 2022-09-12
Supplement: Supplementary file 2 [file 9921d39893778f32dac58ce7.docx]

**Pubmed**

**#1** #Arrest, Heart or #Cardiac Arrest or #Arrest, Cardiac or #Asystole or #Asystoles or #Cardiopulmonary Arrest or #Arrest, Cardiopulmonary

**#2** #Resuscitation, Cardiopulmonary or #CPR or #Cardio-Pulmonary Resuscitation or #Cardio Pulmonary Resuscitation or #Resuscitation, Cardio-Pulmonary or #Code Blue or #Basic Cardiac Life Support or #Life Support, Basic Cardiac

**#3** #Prophylaxis, Antibiotic or #Premedication, Antibiotic or #Antibiotic Premedication or #Antibiotic Premedications or #Premedications, Antibiotic

**#4** #Agents, Anti-Bacterial or #Anti Bacterial Agents or #Antibacterial Agents or #Agents, Antibacterial or #Antibacterial Agent or #Agent, Antibacterial or #Anti-Bacterial Compounds or #Anti Bacterial Compounds or #Compounds, Anti-Bacterial or #Anti-Bacterial Agent or #Agent, Anti-Bacterial or #Anti Bacterial Agent or #Anti-Bacterial Compound or #Anti Bacterial Compound or #Compound, Anti-Bacterial or #Bacteriocidal Agents or #Agents, Bacteriocidal or #Bacteriocidal Agent or #Agent, Bacteriocidal or #Bacteriocide or #Bacteriocides or #Anti-Mycobacterial Agents or #Agents, Anti-Mycobacterial or #Anti Mycobacterial Agents or #Anti-Mycobacterial Agent or #Agent, Anti-Mycobacterial or #Anti Mycobacterial Agent or #Antimycobacterial Agent or #Agent, Antimycobacterial or #Antimycobacterial Agents or #Agents, Antimycobacterial or #Antibiotics or #Antibiotic

**#5** #Agents, Anti-Infective or #Anti Infective Agents or #Antiinfective Agents or #Agents, Antiinfective or #Anti-Infective Agent or #Agent, Anti-Infective or #Anti Infective Agent or #Microbicides or #Anti-Microbial Agent or #Agent, Anti-Microbial or #Anti Microbial Agent or #Antimicrobial Agents or #Agents, Antimicrobial or #Anti-Microbial Agents or #Agents, Anti-Microbial or #Anti Microbial Agents or #Microbicide or #Antimicrobial Agent or #Agent, Antimicrobial

#6 #3 or #4 or #5

#7 #1 or #2

#8 #6 and #7

**Embase**

#1 'heart arrest'/exp

#2 'resuscitation'/exp

#3 'antibiotic prophylaxis'/exp

#4 'antiinfective agent'/exp

#5 #1 or #2

#6 #3 or #4

#7 #5 and #6

**Cochrane**

#1 Mesh descriptor: [heart arrest] explode all trees

#2 Mesh descriptor: [cardiopulmonary resuscitation] explode all trees

#3 Mesh descriptor: [antibiotic prophylaxis] explode all trees

#4 Mesh descriptor: [antiinfective agents] explode all trees

#5 #1 or #1

#6 #3 or #4

#7 #5 and #6

**Ovid**

#1 heart arrest/

#2 cardiopulmonary resuscitation/

#3 antibiotic prophylaxis

#4 antiinfective agents/

#5 #1 or #2

#6 #3 or #4

#7 #5 and #6
